# Supplementary material for: T-cell receptor engineering of primary NK-cells to therapeutically target tumours and tumour immune evasion
Source: Research Square preprint supplement (doi:10.21203/rs.3.rs-145130/v1), 2021-02-03
Supplement: Supplementary file 1 [file 227048ff0563fc3f119599f8.docx]

**Supplemental Methods**

**Viral constructs and virus production.**

BOB1 TCR expressed IMGT: TRAV13-1*01 1 and TRBV4 and CMV TCR expressed IMGT: TRAV18 and TRBV12 and PRAME TCR IMGT: TRAV8*04 and TRBV9 3. Each TCRαβ variable domain was cloned into MP71-TCR-FLEX to obtain murinised TCR constant domains as described in 4. Subsequently, murinised TCR was linked via overlapping primers containing T2A self-cleaving sites to CD8αβ wild type (TCR-CD8) and sub-cloned into pLZRS-markerless expression vector. Codon optimised CD3 invariant chains were linked via 2A self-cleaving sites in the following order, CD3ζ- T2A- CD3δ- P2A -CD3ε -F2A-CD3γ and cloned into a pLZRS-markerless expression vector. 6ug of plasmid was then transfected into 1.5x106 Phoenix-A cells in the presence of Fugene HD transfection reagent (Promega, Wisconsin, USA). Day 2 post transfection, Phoenix-A were subjected to 12 day 1mg/ml puromycin selection (Clontech, California USA). Selected Phoenix-A cells are subsequently cultured in the absence of puromycin (Clontech, California USA) and virus supernatant was harvested after 24 hours and frozen at -80°C.

**Retroviral transduction of NK cells.**

For Retroviral transduction, 24 well flat bottom suspension culture plates (Greiner Bio-One, Austria) were preincubated with 30µg/ml Retronectin (Takara, clontech, Kusatsu, Japan) and blocked with 2% human serum albumin (Sanquin, Amsterdam, The Netherlands). Thawed virus supernatant was added to the plates and centrifuged at 3000g for 20mins at 4°C. Virus supernatant was then removed and 0.4x106 NK cells resuspended in 1ml fresh NK-M were added to each well and incubated overnight at 37°C. The following day, NK cells were transferred for expansion to standard tissue culture plates at a 0.8x106 cell/ml concentration and media was refreshed every 2 days. Retroviral transductions of NK cells occurred on Day 2 or 3 following stimulation as stipulated in figure 1A.

**Magnetic-activated cell sorting (MACS) enrichment of transduced NK cells**

1st enrichment for CD8β : Day 7 post isolation, NK cells transduced with TCR-CD8 were harvested and resuspended at 5x106/ml in cell isolation buffer (Phosphate buffered saline (PBS) (Fresenius Kabi, Bad Homburg, Germany) supplemented with 2% FBS (Gibco, Thermo Fisher Scientific, Waltham, Massachusetts), 1mM EDTA (K.F.T LUMC, The Netherlands) and 1% 10,000 U/ml penicillin/streptomycin (Lonza, Switzerland). Next, NK cells were incubated with anti-CD8β-PE (1:50, Beckman Coulter, clone 2ST8.5H7) for 20mins at 4°C and subsequently washed and resuspended in cell isolation buffer at 10x106/80μl. NK cells were then incubated with anti-PE microbeads (Miltenyi Biotec, Bergisch Gladbach, Germany) 30μl/10x106 cells for 20mins at 4°C.

2nd enrichment for murine TCRβ – Day 14 post isolation, NK cells were similarly harvested and resuspended in cell isolation buffer as described above. NK cells were then incubated with anti-mTCRβ- APC (1:50 BD/Pharmingen, New Jersey, U.S clone H57-597) for 20mins at 4°C and subsequently washed and resuspended in cell isolation buffer at 10x106/80μl. Anti-APC microbeads (Miltenyi Biotec, Bergisch Gladbach, Germany) were then added at 30μl/10x106 and incubated for 20mins at 4°C. For each enrichment, labelled cells were passed over magnetic columns according to manufacturer’s instructions. Cells were then immediately stimulated with irradiated K562-mbIL21-41BBL as described above.

**Genetic modification of T-cells**

T-cells were cultured in T-cell media (TCM) which was the same as NK-M but without IL15. T-cells were isolated from PBMCs using CD8 microbeads (Miltenyi Biotec, Bergisch Gladbach, Germany). T cells were stimulated with irradiated autologous PBMCs (30GY) at a ratio of 1:5 in the presence of 0.8 μg/ml PHA (Oxoid Microbiology Products, Thermo Fisher Scientific, Waltham, Massachusetts) and expanded in TCM. Where stated, CD8T were transfected with *TRAC/TRBC* targeting RNPs, using the NEON transfection system (Thermo Fisher Scientific, Waltham, Massachusetts) using transfection settings 1600v 10ms 3 pulses. T-cells were retrovirally transduced on Day 3 post stimulation with murinised TCRαβ genes and MACS enriched for mTCRβ as described for NK cells on day 7. Enriched T-cells were re-stimulated and functional experiments were conducted on day 10-14 post re-stimulation.

**Monoclonal Antibodies**

Antibodies used in this study were anti-CD3-V450 (1:40, BD/Pharmingen, New Jersey, U.S, clone UCHT1) and anti-CD56-APC (1:10, BD/Pharmingen, New Jersey, U.S, clone B159). anti-muTCRβ- APC (1:50 BD/Pharmingen, New Jersey, U.S clone H57-597), anti-CD56-BV510 (1:50 BD/Pharmingen, New Jersey, U.S clone NCAM16.2), anti-huTCRαβ-PercpCy5.5 (1:50, Biolegend San Diego, U.S clone IP26), anti-CD8β-PE (1:50, Beckman Coulter, clone 2ST8.5H7) anti-NKG2A-PE (1:20, Beckman coulter California, U.S, clone IM3291U), anti-CD16-FITC (1:3 BD/Pharmingen, New Jersey, U.S clone NKP15), anti-CD94-PE (1:33 BD/Pharmingen, New Jersey, U.S, clone HP-3D9), anti-NKp46-BV421 (1:100 clone 9E2), anti-NKG2D-PE (1:00 clone 1D11), anti-NKp30-PE (1:30 clone Z25), anti-NKG2C-BV421 (1:100 clone 134591), anti-NKp30-PE( 1:100, Biolegend San Diego, U.S clone P30-15), anti-NKp44-Percpcy5.5 (1:100, Biolegend San Diego, U.S, clone P44-8), anti-KIR2DL2/KIR2DL3/KIR2DS2-PE (Beckman coulter, clone DX27), anti-KIR3DL1-FITC ( BD/Pharmingen, clone DX9), anti-KIR2DL1-PE ( Beckman coulter, clone EB6.B), anti-KIR2DS4-PE (Beckman coulter, clone FES172), anti-CD2-APC ( BD/Pharmingen clone RPA-2.1), anti-CD28-PE (BD/Pharmingen clone IL293), anti-CD27-AF700 (BD/Pharmingen clone MT271), anti-CD137-APC (BD/Pharmingen clone 4B4-1), anti-PD1-FITC ( BD/Pharmingen clone MIH4), anti-CD226-PE (BD/Pharmingen clone DX11), anti-TNFa-BV421 (BD/Pharmingen clone mab11), anti-IFNg-BV711 (BD/Pharmingen clone B27), anti-CD107a-FITC (BD/Pharmingen clone H4A3) and anti-HLA-ABC-FITC (1:100, Serotec, Oxford, UK, clone W6/32).

**Stimulator cell culture**

Cell lines, UM9 (multiple myeloma), EBV-LCLs (HHC, JY,ULR, IZA) and K562 were cultured in Iscove’s Modified Dulbecco’s Medium (IMDM) (Lonza, Switzerland) supplemented with 10% FBS (Gibco, Thermo Fisher Scientific, Waltham, Massachusetts) 1.5% 200mM l-glutamine (Lonza, Switzerland), 1% 10,000U/ml penicillin/streptomycin (Lonza, Switzerland). B-ALL cell lines were obtained from patient material and were cultured in IMDM (Lonza, Switzerland) with serum free supplement 5. Human fibroblast lines (HBR and VPC) were cultured in Dulbecco’s modified Eagle’s medium (DMEM) (Gibco, Thermo Fisher Scientific, Waltham, Massachusetts) supplemented with 10% FBS (Gibco, Thermo Fisher Scientific, Waltham, Massachusetts) 1.5% 200mM l-glutamine (Lonza, Switzerland), 1% 10,000 U/ml penicillin/streptomycin (Lonza, Switzerland).

1. Jahn L, Hombrink P, Hagedoorn RS, Kester MG, van der Steen DM, Rodriguez T, Pentcheva-Hoang T, de Ru AH, Schoonakker MP, Meeuwsen MH, Griffioen M, van Veelen PA, Falkenburg JH, Heemskerk MH. TCR-based therapy for multiple myeloma and other B-cell malignancies targeting intracellular transcription factor BOB1. Blood. 2017;129(10):1284-95.

2. Heemskerk MH, Hagedoorn RS, van der Hoorn MA, van der Veken LT, Hoogeboom M, Kester MG, Willemze R, Falkenburg JH. Efficiency of T-cell receptor expression in dual-specific T cells is controlled by the intrinsic qualities of the TCR chains within the TCR-CD3 complex. Blood. 2007;109(1):235-43.

3. Amir AL, van der Steen DM, van Loenen MM, Hagedoorn RS, de Boer R, Kester MD, de Ru AH, Lugthart GJ, van Kooten C, Hiemstra PS, Jedema I, Griffioen M, van Veelen PA, Falkenburg JH, Heemskerk MH. PRAME-specific Allo-HLA-restricted T cells with potent antitumor reactivity useful for therapeutic T-cell receptor gene transfer. Clinical cancer research : an official journal of the American Association for Cancer Research. 2011;17(17):5615-25.

4. van der Lee DI, Reijmers RM, Honders MW, Hagedoorn RS, de Jong RC, Kester MG, van der Steen DM, de Ru AH, Kweekel C, Bijen HM, Jedema I, Veelken H, van Veelen PA, Heemskerk MH, Falkenburg JHF, et al. Mutated nucleophosmin 1 as immunotherapy target in acute myeloid leukemia. The Journal of clinical investigation. 2019;129(2):774-85.

5. Nijmeijer BA, Szuhai K, Goselink HM, van Schie ML, van der Burg M, de Jong D, Marijt EW, Ottmann OG, Willemze R, Falkenburg JH. Long-term culture of primary human lymphoblastic leukemia cells in the absence of serum or hematopoietic growth factors. Experimental hematology. 2009;37(3):376-85.
